# Supplementary material
Source: PubMed Central journal article supplement (PMC2846268)
Supplement: NIHMS29275-supplement-Sup_Tab_1.pdf [file NIHMS29275-supplement-Sup_Tab_1.pdf]

| Supplemental Table 1                                                                                                                                                                                                                                                                                                                                                                            |                                                                                     |                       |                                                                                 |                             |
|-------------------------------------------------------------------------------------------------------------------------------------------------------------------------------------------------------------------------------------------------------------------------------------------------------------------------------------------------------------------------------------------------|-------------------------------------------------------------------------------------|-----------------------|---------------------------------------------------------------------------------|-----------------------------|
| PCR primers and product size, Probes                                                                                                                                                                                                                                                                                                                                                            |                                                                                     |                       |                                                                                 |                             |
| Forward                                                                                                                                                                                                                                                                                                                                                                                         | Sequence 5' to 3'                                                                   | Reverse               | Sequence 5' to 3'                                                               | Product size (bp)           |
| 1f                                                                                                                                                                                                                                                                                                                                                                                              | AAGTCAGGATCACCAGCCTTT<br>(Unspliced Transgenic AIR)                                 | 1r                    | TACTACTACTAGACCCACCCG<br>Unspliced Transgenic AIR<br>Identification of SVI,SVII | 280                         |
| 2f                                                                                                                                                                                                                                                                                                                                                                                              | GTTGCAGATGGAGAAGAATGA<br>T1,T2 RACE                                                 |                       |                                                                                 | 259                         |
| 3r                                                                                                                                                                                                                                                                                                                                                                                              | GCTAATGATTACTCCTAGCGAAAA<br>Identification of SVI,SVII                              | Ap<br>(M18818)        | GTATTTGTGAGCCAGGGCAT<br>Identification of SVI,SVII                              | SVI:62<br>7<br>SVII:7<br>25 |
| 4f                                                                                                                                                                                                                                                                                                                                                                                              | CGAGCACTGTTTCCAACAAA<br>T1,T2 RACE                                                  | 4r                    | TCCCAAAAAGTTACACATAGGA<br>A                                                     | 202                         |
| 9f                                                                                                                                                                                                                                                                                                                                                                                              | GCTTCTGTGTCCTTTTGGC<br>Spliced AIR in Wilms' Tumor assay                            | 9r                    | <u>TGCGCTTCTTATTTTCAGTCC</u><br>Spliced AIR in Wilms' Tumor assay               | 160                         |
| 12f                                                                                                                                                                                                                                                                                                                                                                                             | AGGGAACACAGGCAAATGTC<br>intergenic primer between IGF2R & SLC22A1                   | 12r                   | <u>TCACAATGATGCCCTTTTCA</u><br>intergenic primer between IGF2R & SLC22A1        | 556                         |
| HB1                                                                                                                                                                                                                                                                                                                                                                                             | <u>TGTGGTGTGCGCTTCTTATT</u>                                                         | HB2                   | <u>GGCAGAGCCTCCTTAGAACC</u>                                                     | 199                         |
| HC1                                                                                                                                                                                                                                                                                                                                                                                             | <u>GCACCAGGGAAGCCAAAC</u>                                                           | HC2                   | <u>TGAGGAGCGGGACTGAAATA</u>                                                     | 260                         |
| P8HuF                                                                                                                                                                                                                                                                                                                                                                                           | CACGCAGGCCAGGC<br>Spliced IGF2R in Wilms' Tumor qPCR assay                          | P8HuR                 | TGGTATCAACAGCTTCCCATGT<br>Spliced IGF2R in Wilms' Tumor qPCR assay              | 85                          |
| P8Hu                                                                                                                                                                                                                                                                                                                                                                                            | CCCGTTCCCGAGCTGTGCA<br>TaqMan probe for spliced IGF2R                               |                       |                                                                                 |                             |
| H2354F                                                                                                                                                                                                                                                                                                                                                                                          | TCAGATGCAGGAAGATTGGGT                                                               | H2354R                | AGGCTTGGCATCCAGGTG                                                              | 63                          |
| H2354                                                                                                                                                                                                                                                                                                                                                                                           | CTCACAACAGGGCGGTGTTGGA<br>TaqMan probe for unspliced AIR (AIR QPCR1)                |                       |                                                                                 |                             |
| P4HuSplF                                                                                                                                                                                                                                                                                                                                                                                        | GGCTCAGCCAAAAGGACACA<br>Spliced AIR in Wilms' Tumor qPCR assay                      | P4HuSplR              | TCGAACTGGGAGCCATGG<br>Spliced AIR in Wilms' Tumor qPCR assay                    | 66                          |
| P4HuSpl                                                                                                                                                                                                                                                                                                                                                                                         | AAGCCCTGCAGAGGCTCTGAAACCAA<br>TaqMan probe for spliced AIR (AIR QPCR2)              |                       |                                                                                 |                             |
| CYP1 X52803                                                                                                                                                                                                                                                                                                                                                                                     | GTCTCCTTCGAGCTGTTTGC                                                                | CYP2 X52803           | TTCACCTTCCCAAAGACCAC                                                            | 350                         |
| M.m.Gapdh BC083149                                                                                                                                                                                                                                                                                                                                                                              | CCTCGTCCCCTAGACAAAATG                                                               | M.m.Gapdh BC083149    | GTGGGTGCAGCGAACTTTAT                                                            | 1200                        |
| H.s.GAPDH NM_002046.3                                                                                                                                                                                                                                                                                                                                                                           | TGAGTCCTTCCACGATACCA                                                                | H.s.GAPDH NM_002046.3 | GCCAAAAGGGTCATCATCTC                                                            | 177                         |
| SVI probe                                                                                                                                                                                                                                                                                                                                                                                       | EcoRI fragment in Accession number DQ220010                                         |                       |                                                                                 |                             |
| Bx probe                                                                                                                                                                                                                                                                                                                                                                                        | 600bp BstX1 fragment from X83701                                                    |                       |                                                                                 |                             |
| HBas RPA                                                                                                                                                                                                                                                                                                                                                                                        | PCR fragment obtained from primer pair HB1 + HB2 orientation complimentary to AIR   |                       |                                                                                 |                             |
| HBs RPA                                                                                                                                                                                                                                                                                                                                                                                         | PCR fragment obtained from primer pair HB1 + HB2 orientation complimentary to IGF2R |                       |                                                                                 |                             |
| HCas                                                                                                                                                                                                                                                                                                                                                                                            | PCR fragment obtained from primer pair HC1 + HC2 orientation complimentary to AIR   |                       |                                                                                 |                             |
| CYP1 RPA                                                                                                                                                                                                                                                                                                                                                                                        | Provided with the RPAIII Kit, Ambion Inc.                                           |                       |                                                                                 |                             |
| 18S RPA                                                                                                                                                                                                                                                                                                                                                                                         |                                                                                     |                       |                                                                                 |                             |
| Primers were designed from <a href="http://www.ensembl.org/Homo_sapiens">http://www.ensembl.org/Homo_sapiens</a> NCBI 36:Chr.6:160,000,000-161,000,000, except where indicated. The sequence of the forward and reverse primer pairs and product size are listed. Temp <sup>a</sup> , annealing temperature, TM; Taqman primer. Underlined sequences are repetitive in humans but not in mouse. |                                                                                     |                       |                                                                                 |                             |
